# Supplementary material for: Exploration and Improvement of Acid Hydrolysis Conditions for Inulin-Type Fructans Monosaccharide Composition Analysis: Monosaccharide Recovery and By-Product Identification
Source: MDPI journal article supplement (doi:10.3390/foods13081241), 2024-04-18
Supplement: s1 [file s1]

**Supplementary data**

**Optimizing acid hydrolysis for monosaccharide compositional and analysis for hydrolysis by-product of inulin-type Fructan**

*State Key Laboratory of Food Science and Technology, Nanchang University, 235 Nanjing East Road, Nanchang, Jiangxi Province, 330047, China*

\*Corresponding author.

Email: weiweihe\_fs@ncu.edu.cn

**Table S1.** Recovery rate (%) of ITF monosaccharides composition under different H<sub>2</sub>SO<sub>4</sub> concentration, hydrolysis time and temperature (n=3)

| Temperature/°C         |        | 40         |            |       | 60         |            |       | 80         |            |       |
|------------------------|--------|------------|------------|-------|------------|------------|-------|------------|------------|-------|
| Acidic concentration/M | Time/h | Fru        | Glc        | Total | Fru        | Glc        | Total | Fru        | Glc        | Total |
| 0.5                    | 0.25   | 16.81±0.17 | 2.07±0.02  | 18.88 | 46.15±0.46 | 10.86±0.11 | 57.02 | 52.62±0.03 | 13.87±0.01 | 66.49 |
|                        | 0.5    | 43.15±0.43 | 9.39±0.09  | 52.53 | 51.14±0.51 | 10.7±0.11  | 61.84 | 46.3±0.01  | 12.27±0.01 | 58.57 |
|                        | 1      | 55.14±0.55 | 10.61±0.11 | 65.75 | 50.01±0.5  | 13.49±0.13 | 63.50 | 54.31±0.54 | 14.28±0.14 | 68.59 |
|                        | 2      | 54.81±0.55 | 11.76±0.12 | 66.58 | 52.97±0.53 | 13.97±0.14 | 66.94 | 50.79±0.51 | 12.61±0.13 | 63.40 |
| 1                      | 0.25   | 47.21±0.47 | 12.46±0.12 | 59.67 | 49.1±0.49  | 12.37±0.12 | 61.47 | 48.33±0.07 | 12.79±0.02 | 61.12 |
|                        | 0.5    | 55.11±0.55 | 14.04±0.14 | 69.15 | 50.17±0.5  | 12.86±0.13 | 63.03 | 44.24±0.03 | 11.43±0.01 | 55.68 |
|                        | 1      | 53.03±0.53 | 13.05±0.13 | 66.08 | 51.34±0.51 | 13.24±0.13 | 64.58 | 49.78±0.5  | 13.3±0.13  | 63.08 |
|                        | 2      | 52.34±0.52 | 13.6±0.14  | 65.94 | 48.03±0.48 | 13.02±0.13 | 61.05 | 54.17±0.54 | 15.78±0.16 | 69.95 |
| 2                      | 0.25   | 40.39±0.4  | 12.35±0.12 | 52.74 | 39.42±0.39 | 11.79±0.12 | 51.22 | 38.81±0.05 | 10.43±0.01 | 49.24 |
|                        | 0.5    | 38.21±0.38 | 11.89±0.12 | 50.11 | 42.17±0.42 | 12.85±0.13 | 55.01 | 39.47±0.08 | 10.71±0.03 | 50.18 |
|                        | 1      | 41.44±0.41 | 12.15±0.12 | 53.58 | 45.12±0.45 | 11.79±0.12 | 56.91 | 47.31±0.47 | 12.74±0.13 | 60.05 |
|                        | 2      | 36.85±0.37 | 10.98±0.11 | 47.84 | 36.83±0.37 | 8.44±0.08  | 45.27 | 51.63±0.52 | 15.14±0.15 | 66.77 |

(Continued Table)

| Temperature/°C         |        | 100        |            |       | 120        |            |       |
|------------------------|--------|------------|------------|-------|------------|------------|-------|
| Acidic concentration/M | Time/h | Fru        | Glc        | Total | Fru        | Glc        | Total |
| 0.5                    | 0.25   | 51.17±0.01 | 14.33±0.01 | 65.51 | 36.39±0.01 | 14.3±0.01  | 50.69 |
|                        | 0.5    | 49.98±0.01 | 14.55±0.01 | 64.53 | 28.89±0.02 | 12.98±0.01 | 41.87 |
|                        | 1      | 49.85±0.05 | 13.39±0    | 63.24 | 22.84±0.16 | 13.84±0.02 | 36.68 |
|                        | 2      | 49.43±0.09 | 14.97±0.01 | 64.40 | -          | 12.29±0.01 | 12.29 |
| 1                      | 0.25   | 50.3±0.03  | 13.43±0    | 63.73 | 37.69±0.03 | 14.01±0.01 | 51.70 |
|                        | 0.5    | 48.62±0.03 | 13.82±0    | 62.44 | 26.32±0.09 | 12.63±0.01 | 38.95 |
|                        | 1      | 43.19±0.03 | 13.24±0    | 56.43 | -          | 12.88±0.02 | 12.88 |
|                        | 2      | 36.09±0.17 | 14.16±0.01 | 50.25 | 4.81±0.03  | 10.24±0.00 | 15.05 |
| 2                      | 0.25   | 46.1±0.03  | 13.19±0.01 | 59.29 | 33.13±0.03 | 12.56±0.01 | 45.69 |
|                        | 0.5    | 44.1±0.04  | 13.54±0    | 57.63 | 14.24±0.06 | 10.16±0.00 | 24.40 |
|                        | 1      | 38.43±0.08 | 13.49±0.01 | 51.93 | 7.58±0.05  | 11.79±0.02 | 19.37 |
|                        | 2      | 11.93±0.22 | 13.43±0    | 25.36 | -          | 12.09±0.00 | 12.09 |

Data format: Mean ± Standard Deviation (SD)

-: Not detected

**Table S2.** Identified compounds potentially presented in the hydrolysis products of both fructose (Fru) and isomaltulose (ITF).

| No | Common degradation products of Fru and ITF             |
|----|--------------------------------------------------------|
| 1  | (R)-(-)-Mellein                                        |
| 2  | (Z)-Methyl 3-(Methylsulfinyl)-1-Propenyl Disulfide     |
| 3  | 1,4-Dihydroxy-2-Naphthoic acid                         |
| 4  | 10-Hydroxy-2,8-Decadiene-4,6-diynoic acid              |
| 5  | 19-Hydroxy-8-O-Methyltetrangulol                       |
| 6  | 1-Naphthol                                             |
| 7  | 2,5-Dihydro-2,4,5-Trimethyloxazole                     |
| 8  | 2,5-Furandicarboxaldehyde                              |
| 9  | 2-C-Methyl-D-Erythritol 4-Phosphate                    |
| 10 | 2-Furanmethanol                                        |
| 11 | 2-Hydroxy-3-Methylbenzalpyruvate                       |
| 12 | 2-Hydroxy-5-Methylquinone                              |
| 13 | 2-Hydroxy-6-oxo-6-(2-Hydroxyphenoxy)-Hexa-2,4-Dienoate |
| 14 | 2-Hydroxy-8-Methylchromene-2-carboxylate               |
| 15 | 2-Hydroxycinnamic acid                                 |
| 16 | 2-Hydroxyxanthone                                      |
| 17 | 2-O-(Z-p-Hydroxycinnamoyl)-(x)-Glyceric acid           |
| 18 | 2-Phenylethanol                                        |
| 19 | 3-Hydroxy-2H-Pyran-2-one                               |
| 20 | 3-Methoxy-4-Hydroxyphenylethylene Glycol               |
| 21 | 3-O-Demethylamorphigenin                               |
| 22 | 4-Hydroxycoumarin                                      |
| 23 | 4-Methylmuconolactone                                  |
| 24 | 5-(3',4'-Dihydroxyphenyl)-Gamma-Valerolactone          |
| 25 | 5,5'-Dehydrodivanillate                                |
| 26 | 5-Hydroxymethyl-2-Furaldehyde                          |
| 27 | 5-Methyl-2-furaldehyde                                 |
| 28 | 6,8-Di-C-methylmyricetin 3-Methyl Ether                |
| 29 | 6-Methoxymellein                                       |

|    |                                                 |
|----|-------------------------------------------------|
| 30 | 7-Methyl-2-Benzofurancarboxaldehyde             |
| 31 | Anhydrobrazilic acid                            |
| 32 | Calcium Propionate                              |
| 33 | Dimethylcaffeic acid                            |
| 34 | DL-Benzylsuccinic acid                          |
| 35 | Epicatechin                                     |
| 36 | Epigallocatechin                                |
| 37 | Eugenitol                                       |
| 38 | Furfural                                        |
| 39 | Guaiacylacetone                                 |
| 40 | Haematommic acid, Ethyl Ester                   |
| 41 | Herniarin                                       |
| 42 | Hymecromone Methyl Ether                        |
| 43 | Hypolaetin 8,3'-Dimethyl Ether                  |
| 44 | Isoscopoletin                                   |
| 45 | Koparin 2'-Methyl Ether                         |
| 46 | Lecanoric acid                                  |
| 47 | Methyl 3-(4-Methoxyphenyl)-2-Oxopropanoate      |
| 48 | Methyl 7-Deshydroxypyrogallin-4-Carboxylate     |
| 49 | Phenyl Glucuronide                              |
| 50 | Pyochelin                                       |
| 51 | Quercetin 3-Methyl Ether                        |
| 52 | Ramentaceone                                    |
| 53 | Ser-Asp-OH                                      |
| 54 | Sodium ( $\pm$ )-2-(4-Methoxyphenoxy)Propionate |
| 55 | Sucrose                                         |
| 56 | Temozolomide                                    |
| 57 | $\beta$ -L-Fucose 1-Phosphate                   |

---
